# Supplementary material
Source: MDPI journal article supplement (https://www.mdpi.com/2073-4395/12/11/2766)
Supplement: s1 [file s1]

**Table S1.** Cost of cultivation for the maize–wheat cropping system in US\$

| <b>Treatments</b> | <b>Common cost (US\$)</b> | <b>Treatment cost (US\$)</b> | <b>Total cost of cultivation (US\$)</b> |
|-------------------|---------------------------|------------------------------|-----------------------------------------|
| PB*FFP            | 1027                      | 151                          | 1177                                    |
| PB*SSNM           | 1027                      | 155                          | 1181                                    |
| PB*GreenSeeker    | 1027                      | 148                          | 1175                                    |
| ZT*FFP            | 1027                      | 111                          | 1137                                    |
| ZT*SSNM           | 1027                      | 115                          | 1141                                    |
| ZT*GreenSeeker    | 1027                      | 108                          | 1135                                    |
| CT*FFP            | 1027                      | 177                          | 1204                                    |
| CT*SSNM           | 1027                      | 181                          | 1208                                    |
| CT*GreenSeeker    | 1027                      | 175                          | 1201                                    |
